# Supplementary material for: DNA Damage in Oocytes Induces a Switch of the Quality Control Factor TAp63α from Dimer to Tetramer
Source: PubMed Central journal article supplement (PMC3087504; doi:10.1016/j.cell.2011.01.013), 2011-02-18
Supplement: mmc1.pdf [file mmc1.pdf]

| Protein                | M <sub>w</sub> (kDa) | M <sub>w, fit</sub> (kDa), [n*]                          |
|------------------------|----------------------|----------------------------------------------------------|
| MBP-TAp63 $\alpha$     | 116.0                | 230.0 <sup>#</sup> , [2.0]<br>249.5 <sup>§</sup> , [2.2] |
| MBP-TAp63 $\alpha$ FTL | 115.9                | 336.6 <sup>#</sup> , [2.9]<br>389.3 <sup>§</sup> , [3.4] |
| MBP-TAp63 $\gamma$     | 94.2                 | 308.0 <sup>#</sup> , [3.3]<br>327.2 <sup>§</sup> , [3.5] |

\* theoretical number of monomers

<sup>#</sup> calculated using ULTRASPIN

<sup>§</sup> calculated using HETEROANALYSIS
